# Supplementary material for: Ambient temperature and cardiovascular mortality: a systematic review and meta-analysis
Source: PeerJ. 2017 Aug 4;5:e3574. doi: 10.7717/peerj.3574 (PMC5546177; doi:10.7717/peerj.3574)
Supplement: Data S1 [file peerj-05-3574-s001.xlsx]

## Sheet: heat wave
	NO of Study	author	year of study	loctaion	duration	sample	Total Dialy Mortality	Dialy mortality in Min Temp	Dialy Mortality in Max Temp	male	females	confounding	vulenrable Group	Nmber of Death in Vulenerable Group Generally	value of Outcom in vulenerable Group Cold	CI Lowercold	CI Uppercold	value of Outcom in vulenerable Group Hot	CI Lowerhot	CI Upperhot	Worset Lag ( Cold)	Worset Lag( heat )	threshold	Tempreater of Treshold	percentile of threshold	mean / median Tem	Minimum/Lowest Percentile Temprature in Duration of study	Maximum Tempratur/ highest percentile in Duration of study	value of outcomehot	ci-lowerhot	ci-upperhot	Value of Outcome Male	CI Lowermale	CI Uppermale;	Value of Outcome female	CI lower female	CI Upper female	standard error	p-value	1°> /threshould	Tempreture of Treshold	percentage of threshold	value of outcome cold	ci-lowercold	ci-upper cold	Value of Outcome Malecold	CI Lowermalecold	CI uppermalecold	Value of Outcom Femalecold
																									heat effet																	cold effect
	1	lin-heart	2013	taiwan CVD(Gene)	1994-2007						na		no								0-20	0-3	1	31 C campare with 27 C	97	24			1.22	1.02	1.46										15 C	5	2.04	1.61	2.58
	1	lin-heart	2013	Taipei	1994-2007	3.75
	1	lin-heart	2013	Taichung	1994-2007	1.32
	1	lin-heart	2013	Tainan	1994-2007	1.21
	1	lin-heart	2013	Kaohsiung	1994-2007	1.25
	2	Tian, Zhaoxing	2012	china	2000-2011	26460				18,250	8210	na	> =65		1.29	1.06	1.58	1.47	1.13	1.91	0-5	0-3	1		99th percentile of temperature (30.5°C) relative to 90th percentile of temperature (27.0°C).	13.3	−7.6°C	30.5	1.38	1.2	1.6	1.37	1.16	1.62	1.42	1.11	1.82					1st percentile of temperature (−7.6°C) relative to 10th percentile oftemperature (−2.2°C).	1.16	1.04	1.30	1.15	0.95	1.39	1.18
	3	Yu, Weiwei	2011	Queensland	1996 and December 2004	22805	6.9	0	31	no	no	no	>85		1.039	1.019	1.06	1.072	1.043	1.102	0-20	Lag 0	yes	24 °C	Hot effects (>24 °C) % increasea	20.1	9.8	31.9	1.058	1.03	1.08								<0.05	The percent increase with 1 C of temperature decrease below 24 C.24			1.034	1.009	1.06
	4	Qiao, Zhen	2015	Australia	1996–2004	22399	6.4				no	no	65–84					1.25	1.157	1.35		0-1	yes		29°C compared with 28°C (threshold temperature)	24.5	14.7	40.2	1.22	1.16	1.29									29°C compared with 28°C (threshold temperature)		no
	5	Goggins,William B	2013	Hong Kong	1999-2009	64240	16			51	40	yes	75–84		1.47	1.37	1.56				0-20		no		no	18.9		no														10 th(14.1)	1.56	1.43	1.70	1.40	1.33	1.57	1.51
	5	Goggins,William B	2013	Tiapia	1999-2008	32850	9			21	14	yes	75–84		1.46	1.33	1.62				0-17		no		no	18.8		no														10 th(13.8)	1.64	1.47	1.85	1.37	1.26	1.48	1.33
	6	Jun Yang,	2015	China	2007–2013	1936116							75+		1.16	1.13	1.18	1.12	1.09	1.015					99th campare with MMT	not mention			1.013	1.01	1.015	1.013	1.01	1.015					p<0.05.	from MMT		1th campare with MMT	1.16	1.13	1.18	1.16	1.13	1.18	1.15
	7	Kim, Jayeun	2015	China, Japan, Korea, and Taiwan	1979 - 2010								≥65									0-4				varied according city and contry			1.0002	0.99	1.003									1°> in mean T
35.8617	7	Kim, Jayeun	2015	China, Japan, Korea, and Taiwan(Korea)	1979 - 2010	38544	3.3						≥65									0-4				varied according city and contry
	7	Kim, Jayeun	2015	China, Japan, Korea, and Taiwan(China)	1979 - 2010		Japan 50.5						≥65									0-4				varied according city and contry
	7	Kim, Jayeun	2015	China, Japan, Korea, and Taiwan(Japan)	1979 - 2010		Kore No						≥65									0-4				varied according city and contry
	7	Kim, Jayeun	2015	China, Japan, Korea, and Taiwan(Tiawan)	1979 - 2010		Taiwan No						≥65									0-4				varied according city and contry
	8	Yang, Jun (CVD)	2012	Guangzhou China.	2003 to 2007	43393	24	6	102				85+		1.29	1.107	1.46	1.17	1.06	1.30	10_12	0				23°	19.8°	27.6°	1.21	1.12	1.30	1.08	1.18	1.14	1.25	1.16	1.33			99th to the 90th percentile			1.24	1.11	1.35	1.31	1.20	1.42	1.16
(19.35°C, 1st percentile of temperature) relative to 24.7°C (25th	9	Guo, Yuming	2012	Thailand ,Chiang Mai	1999 to 2008	11746	3						75-84		1.30	1.05	1.61	1.33	1.08	1.64	0–21	0-1		31.7°C relative 27 C	99th percentile relative to (75th)	26.2	13.3	33.5	1.12	0.94	1.33										19.35 C relative 24.7 C	1th percentile relative to (25th)	1.45	1.04	2.02
percentile of temperature)	10	Yi, Wen	2014	Hong Kong	2002–2011	98091	27	7	61				≥75		1.41	1.35	1.51	1.10	1.01	1.15	0–21	0-3			99th percentile of mean temperature (31.5 °C) relative to 75th percentile of temperature (27.8 °C	23.4	5.8	35.4	1.08	0.98,	1.23											1st percentile of temperature (11.1 °C) with25th percentile of temperature (19.4 °C).	1.56	1.05	2.14
	11	Seposo, Xerxes T.	2015	Philippines)	2006-2010	26828	14.7	1.00	29.0	29.7	22.3	no	≥65		1.14	0.87	1.50	1.53	1.31	1.80	0-3	0		30.2 °C	99	28.8	23.5	33.3	1.37	1.07	1.75	1.24	1.13	1.37	1.47	1.27	1.69					1th percentile	1.32	0.87	2.01	0.92	0.80	1.06	1.05
1.75 (1.18, 2.32)	12	Chen,Renjie	2014	Chine	2009–2011	126925							≥65		1.81	1.06	2.56	1.51	1.04	2.19	0-28	0–14			99th percentile relative to 75th percentile	4.9°C to 23°C			1.53	1.27	1.84	1.73	1.28	2.32	1.48	1.09	1.99					1st percentile of temperature with25th percentile	1.49	1.26	1.76	1.69	1.15	2.48	1.52
	13	Gue, Yaming	2012	china( Bijing)	2004–2008	16559															0-20	0-13			†99th percentile of temperature relative to 90th percentile	13.6	–10.1	32.1	1.25	1.00	1.55											1st percentile of temperature relative to 10th percentile	1.42	1.11	1.81
	13	Gue, Yaming	2012	china(Tianjin)	2004–2008	16559															0-20	0-13			†99th percentile of temperature relative to 90th percentile	13.3	–10.5	31.3	1.32	1.07	1.62											1st percentile of temperature relative to 10th percentile	1.39	1.18	1.64
	13	Gue, Yaming	2012	china(Shanghai)	2004–2008	16559															0-20	0-13			†99th percentile of temperature relative to 90th percentile	17.6	–3.2	33.8	1.04	0.83	1.31											1st percentile of temperature relative to 10th percentile	1.65	1.20	2.28
	13	Gue, Yaming	2012	china(Wuhan)	2004–2008	16559															0-20	0-13			†99th percentile of temperature relative to 90th percentile	18.2	–2.7	34.2	1.59	1.16	2.18											1st percentile of temperature relative to 10th percentile	1.59	1.25	2.03
	13	Gue, Yaming	2012	china(Guangzhou)	2004–2008	16559															0-20	0-13			†99th percentile of temperature relative to 90th percentile	22.9	5.4	34.2	1.34	1.06	1.70											1st percentile of temperature relative to 10th percentile	1.89	1.43	2.50
	14	Kim,Honghyok	2015	Korea	1995 - 2011	52742	8.5						≥65	05.9							0-21	0- 21		29 C relative 25 C	99th percentile (29 °C), relative to the 90th percentile (25 °C),	12.8	−15.7	30.4	1.118	1.03	1.21								<0.001	99th vs 90th			1.005	0.81	1.013
35.8617	15	Huang,Zhengjing	2015	66 Chinese ,communities	2006–2011	552866							>85		1.04	1.03	1.05	1.017	1.032	1.021	0-21	0-2		25 C to 28 C	minimum mortality temperature	4.6 to 22.9			1.012	1.009	1.014	1.008	1.007	1.012	1.013	1.010	1.016			1 °C above MMT			1.039	1.034	1.050	1.033	1.029	1.038	1.034
	16	Yang,Changyuan	2015	Shanghai, China	1981 - 2012	57806	5														0–28	0-1		32 C	99th percentile of mean temperature (32.0 °C) relative to the threshold	16.9	−8.0	39.6	1.16	1.11	1.21								Decreas 26 C	1st percentile ofmean temperature (0.0 °C) relative to the threshold temperature		1st percentile ofmean temperature (0.0 °C) relative to the threshold temperature	1.99	1.85	2.14
	17	Breitner,Susanne	2014	Bavaria, Germany(Munich)	1990- 2006	90593	14.6						≥85 years								0-14	0-1				9.8	−14.2	29.2	1.09	1.05	1.13									99th percentile relative to 90th percentile		1st percentile relative to 10th percentile	1.10	1.05	1.16
	17	Breitner,Susanne	2014	Bavaria, Germany(Nuremberg)	1990- 2006	47775	7.7						≥85 years								0-14	0-1				9.7	−15.1	28.7	1.16	1.10	1.22									99th percentile relative to 90th percentile		1st percentile relative to 10th percentile	1.02	0.95	1.09
	17	Breitner,Susanne	2014	Bavaria, Germany(Augsburg)	1990- 2006	26061	4.2						≥85 years								0-14	0-1				9.4	−15.3	27.1	1.06	1.00	1.12									99th percentile relative to 90th percentile		1st percentile relative to 10th percentile	1.11	1.01	1.21
	18	Wang, Cuicui	2013	Suzhou, China	2005-2008	18530	12.7						≥65		1.80	1.45	2.24	1.38	1.21	1.58	0-28	0-7		32.6 C	99th campare with MMT (26 C)	17.2	−2.8	33.8	1.82	1.53	2.16	1.33	1.14	1.56	1.39	1.17	1.46		P< 0.05		_0.3	1st percentile compare with MMT (26 C)	2.67	1.64	4.33	1.63	1.26	2.10	1.74
	19	Ma,Wenjuan	2014	17largeChinesecities	1996-2008																0-28	0-14			1 °C increase from the 75th to 99th				3.02	1.33	4.71											1 °C decrease fromthe25th to1th	3.27	1.83	4.27
	20	Yang, Jun	2015	Guangzhou, China	2003–2007	43435	23.8						75+		1.04	1.02	1.06	1.06	1.03	1.1	0-14	0-4			1 °C increase from the 75th percentile of temperature to 99th percentile	23.0	2.1	39.1	1.04	1.02	1.07	1.03	0.99	1.06	1.06	1.02	1.09		P< 0.05			1 °C decrease from the 25th percentileof temperature to 1st percentile	1.04	1.03	1.06	1.05	1.03	1.07	1.03
	21	Huang, Jixia	2014	Changsha , China	2008-2011	19418	13.3			10,912/ 7.5 D	8,506,/ 5.8 D		≥65 years	11.0/D	1.07	1.05	1.09	1.04	1.01	1..07	0-25	0-3			29, °C	18.3	−5.3	40.7	1.049	1.02	1.08	1.04	1.001	1.08	1.06	1.02	1.11		p < 0.05.	(>29 °C)		10°C	1.066	1.052	1.082	1.046	1.056	1.082	1.067
	22	Yu, Weiwei	2011	Brisbane, Australia	1996–2004.	22805							over 65 years		1.03	1.007	1.06	1.04	1.004	1.07	0-15	0-1		24	the percent increase with 1°C of temperature increase above 24°C	20.1			1.035	1.004	1.067								p<0.05.	1 °Cincrease above the threshold temperature of 24°C	24 C	the percent increase with 1°C of temperature decrease below 24 °C;	1.028	1.005	1.051
	23	Emily Ying	2012	Hong Kong	1998-2006	129688							<75					1.065	1.015	1.118		0		28.2		27.6	19.7	31.8	1.018	1.014	1.162	1.045	1.001	1.092	1.068	1.017	1.121
	24	Xuying Wang	2015	Beijing	2007-2009	43800	40														0-27	0-14	99th to 90th			13.6			1.18	1.11	1.25								< 0.05	99th percentile against the 90th percentile			1.35	1.24	1.46
	24	Xuying Wang	2015	Shanghai	2007-2009	19710	18														0-27	0-14	99th to 90th			17.7			1.10	0.99	1.20								< 0.05	99th percentile against the 90th percentile			1.14	1.02	1.27
	25	Li Bai	2014	Chengguan	2008-2012	2524							<65		1.769	1.044	3.096	1.078	1.003	1.182	0-7	0	99th to 75th			9.7	_7.3	22.6	0.733	0.469	0.976	1.141	0.848	1.535	1.021	0.712	1.465		< 0.05	99th percentile against the 75th percentile			1.617	0.737	3.548	1.456	0.937	2.262	1.470
	25	Li Bai	2014	Naidong	2008-2012	1722							≥65		1.242	0.781	1.974	1.893	1.026	3.491	0-7	0	99th to 75th			9.2	_8.1	21.2	1.312	0.821	2.099	1.670	1.108	2.519	0.345	0.150	0.795			99th percentile against the 75th percentile			1.890	1.083	3.627	1.125	0.690	2.148	1.308
	25	Li Bai	2014	Jiangzi	2008-2012	1364							≥65		4.031	1.058	7.150	1.340	0.739	2.430	0-14	0-2	99th to 75th			5.8	_12.2	16.4	2.318	1.026	5.238	1.920	1.047	3.524	1.427	0.755	2.696			99th percentile against the 75th percentile			3.677	0.918	7.721	2.925	1.053	8.628	2.343
	26	Gomez-Acebo	2013	Spain	2004-2005	1252							≥75		3.8	2.83	5.09																										2.63	1.88	3.67	3.9	2.51	6.06	5.09
[truncated: 76 more columns]
